# Supplementary material
Source: Royal Society of Chemistry journal article supplement (doi:10.1039/d6ma00330c)
Supplement: d6ma00330c1.pdf [file d6ma00330c1.pdf]

## Supplementary File

### **Carbon nanotube incorporated magnetic biochar derived from water hyacinth for chromium removal from tannery effluent**

M. Hedayet Ullah<sup>1,2</sup>, Mohammad Jellur Rahman<sup>1\*</sup>

<sup>1</sup> Department of Physics, Bangladesh University of Engineering and Technology, Dhaka-1000, Bangladesh

<sup>2</sup> Department of Physics, Bangladesh University of Textiles, Dhaka-1208, Bangladesh

*\*Corresponding Author:* Mohammad Jellur Rahman (Email: mjrahman@phy.buet.ac.bd)

*First Author:* M. Hedayet Ullah (hedayet@phy.butex.edu.bd)

## Supplementary File

### 2.5. Characterization

The surface morphology of the raw WHB and the nanocomposite are characterized using field-emission scanning electron microscopy (FE-SEM, Zeiss Sigma 300VP, Germany) and transmission electron microscopy (TEM, Talos F200X G2, Thermo Fisher Scientific). A BET Sorptometer (BET-201-A, PMI, USA) is used to measure the surface areas. The chemical structure of the synthesized samples is identified using a double-beam FTIR spectrometer (Shimadzu, FTIR-8400) with wave numbers ranging from 400 to 4000  $\text{cm}^{-1}$  and a resolution of 2  $\text{cm}^{-1}$ . The crystalline phases of the nanocomposite are characterized using powder X-ray diffraction (XRD) analysis, performed on a Philips X'Pert PW 3040 diffractometer (Netherlands) with  $\text{CuK}\alpha$  radiation over a  $2\theta$  range of  $10^\circ$  to  $90^\circ$ . X-ray photoelectron spectroscopy (XPS) is performed with a  $\text{K}\alpha$  spectrometer to analyze the chemical states of the elements. The total Cr concentration in the contaminated water is measured by atomic absorption spectroscopy (AAS, iCE 3000 series, USA).

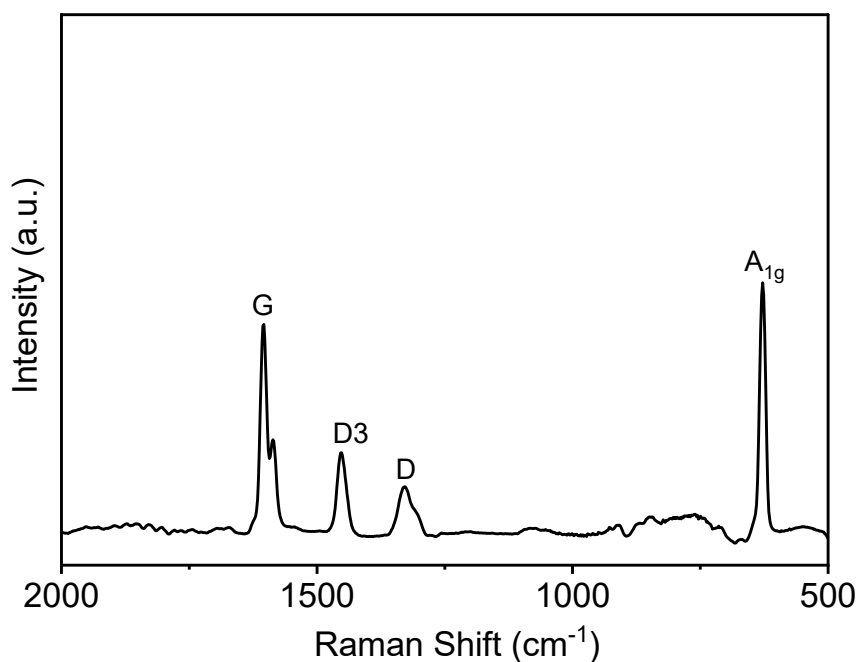

**Fig. S1** Raman spectrum of CNT-CZB nanocomposite at room temperature.

## Supplementary File

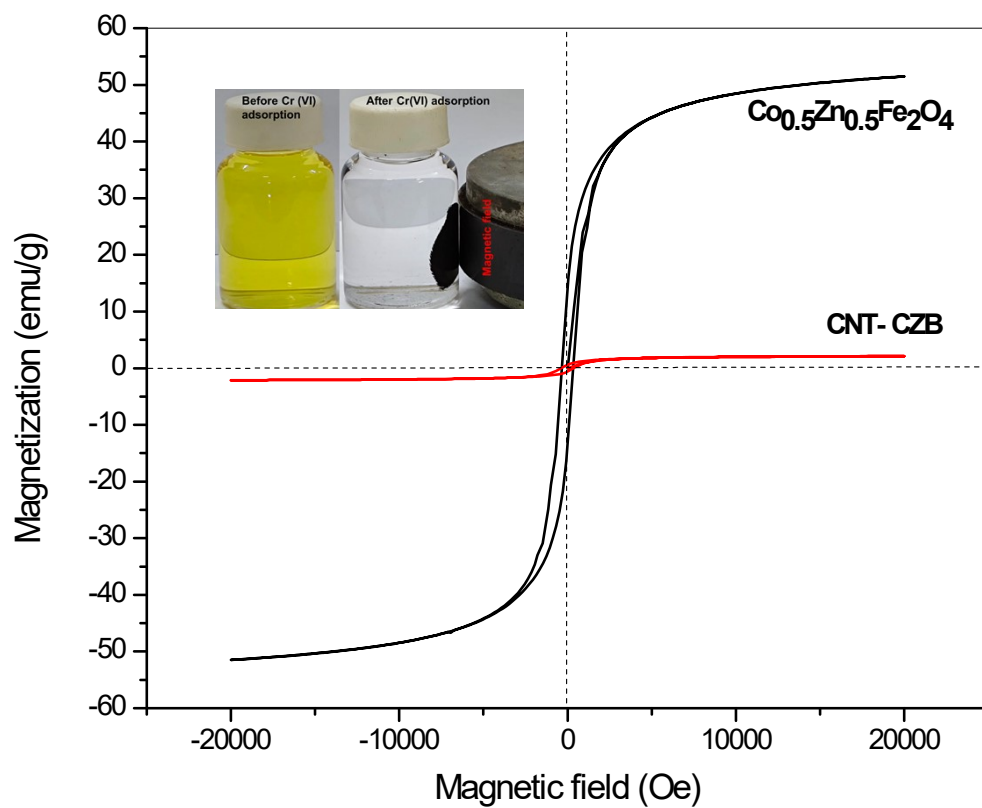

**Fig. S2** Magnetization curve for Co-Zn ferrite and CNT-CZB nanocomposite.

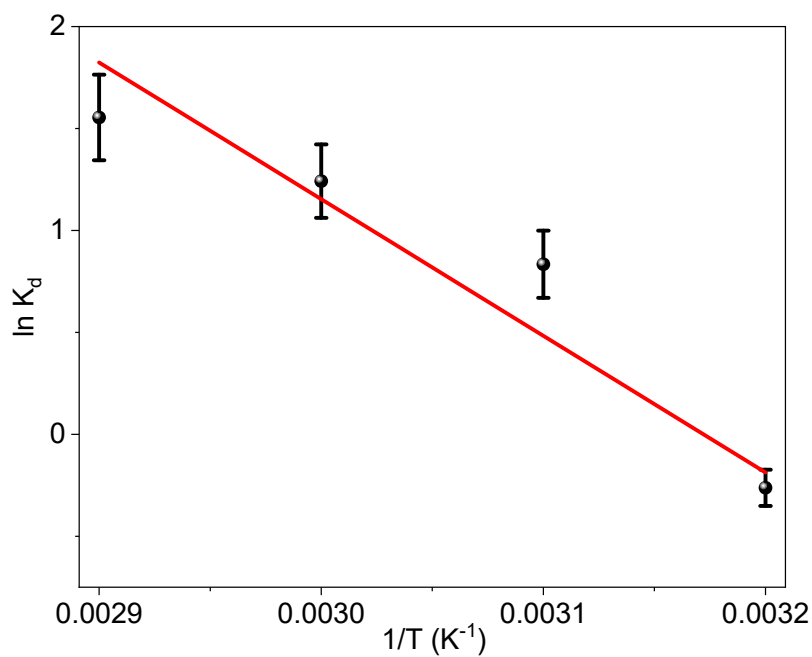

**Fig. S3** A plot of  $\ln K_d$  versus  $1/T$  to estimate the thermodynamic parameters for Cr adsorption on the CNT-CZB nanocomposite.

### Supplementary File

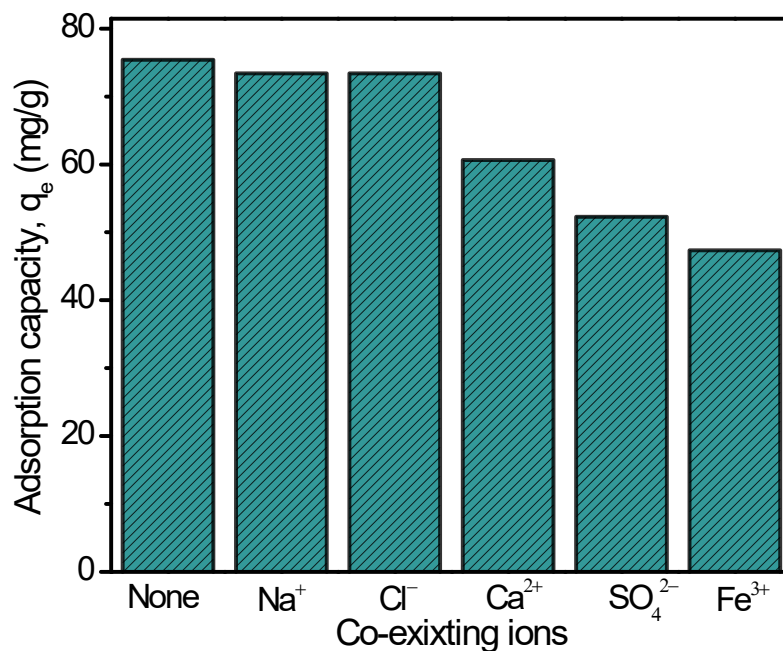

**Fig. S4** Effect of co-existing ions on the adsorption capacity of Cr.

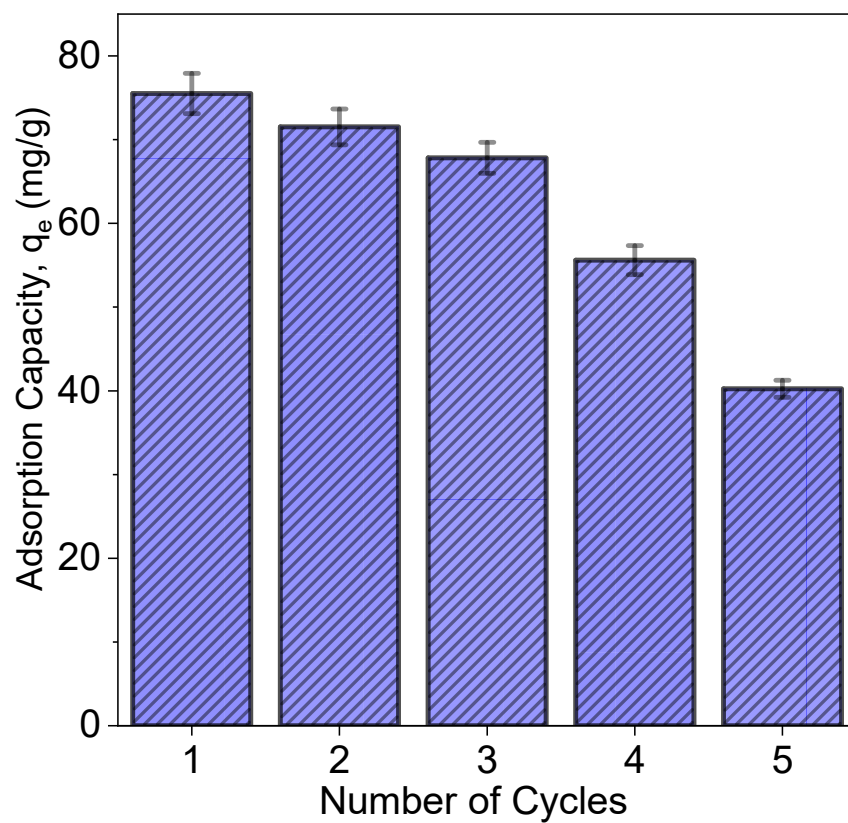

**Fig. S5** Reusability study of CNT-CZB composite.

### Supplementary File

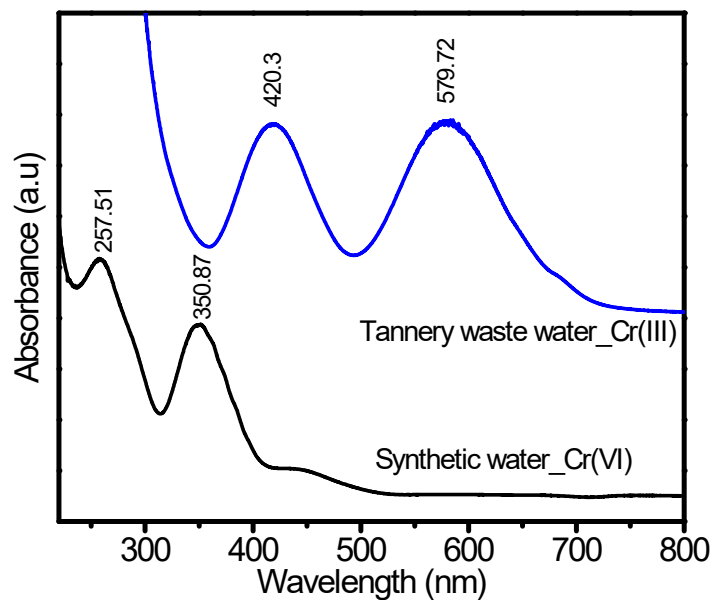

**Fig. S6** UV-Vis spectra of the synthetic sample and tannery wastewater.

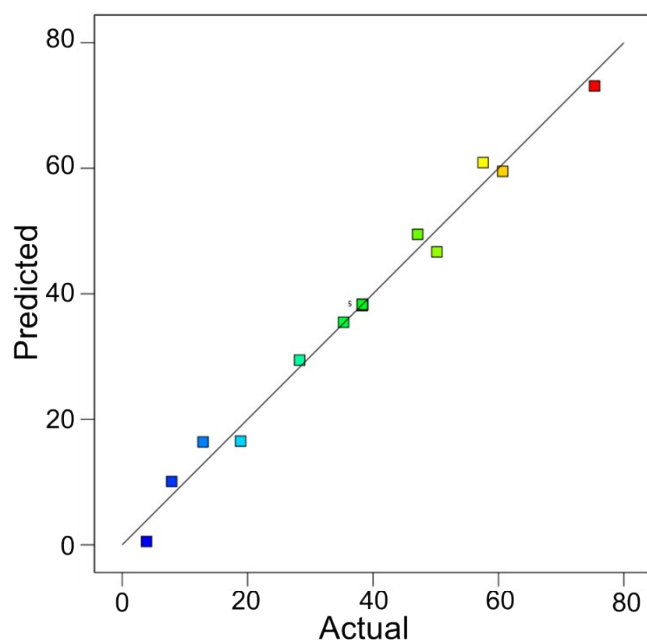

**Fig. S7** Actual and predicted values of the model for Cr adsorption capacity.

## Supplementary File

**Table S1** Parameters associated with different kinetic models for Cr adsorption.

| Model   | Parameters                 | <i>a</i> -WHB   | CNT-CZB         | Interpretation                                                                   |
|---------|----------------------------|-----------------|-----------------|----------------------------------------------------------------------------------|
| PFO     | $q_{m, exp}$ (mg/g)        | 44.58 ± 1.41    | 78.12 ± 1.58    | The adsorption process is dominated by physical adsorption or surface diffusion. |
|         | $q_{m, cal}$ (mg/g)        | 43.62 ± 0.70    | 74.28 ± 1.60    |                                                                                  |
|         | $k_1$ (min <sup>-1</sup> ) | 0.051 ± 0.002   | 0.168 ± 0.017   |                                                                                  |
|         | $R^2$                      | 0.993           | 0.955           |                                                                                  |
|         | Adj $R^2$                  | 0.992           | 0.944           |                                                                                  |
|         | $\chi^2$                   | 2.143           | 8.983           |                                                                                  |
|         | RSS                        | 15.005          | 35.933          |                                                                                  |
| PSO     | $q_{m, exp}$ (mg/g)        | 44.58 ± 1.41    | 78.12 ± 1.58    | Adsorption is primarily chemically controlled.                                   |
|         | $q_{m, cal}$ (mg/g)        | 49.61±0.74      | 80.62 ± 0.563   |                                                                                  |
|         | $k_2$ (g/mg.min)           | 0.002 ± 0.00007 | 0.003 ± 0.00001 |                                                                                  |
|         | $R^2$                      | 0.996           | 0.995           |                                                                                  |
|         | Adj $R^2$                  | 0.995           | 0.994           |                                                                                  |
|         | $\chi^2$                   | 1.157           | 0.939           |                                                                                  |
|         | RSS                        | 8.101           | 3.757           |                                                                                  |
| Elovich | $\alpha$ (mg/g.min)        | 5.22 ±1.41      | 4.85 ± 3.03     | Heterogeneous surface with a reasonably high initial adsorption rate.            |
|         | $\beta$ (g/mg)             | 0.096 ± 0.01    | 0.118 ± 0.01    |                                                                                  |
|         | $R^2$                      | 0.958           | 0.917           |                                                                                  |
|         | Adj $R^2$                  | 0.952           | 0.897           |                                                                                  |
|         | $\chi^2$                   | 2.311           | 16.553          |                                                                                  |
|         | RSS                        | 13.871          | 66.214          |                                                                                  |

## Supplementary File

**Table S2** Parameters associated with the different isotherm models for Cr adsorption on WHB and CNT-CZB.

| Model      | Parameters          | <i>a</i> -WHB | CNT-CZB        | Interpretation                                   |
|------------|---------------------|---------------|----------------|--------------------------------------------------|
| Langmuir   | $q_{m, exp}$ (mg/g) | 43.12 ± 4.75  | 79.80 ± 3.99   | Monolayer adsorption on a homogeneous surface.   |
|            | $q_{m, cal}$ (mg/g) | 41.22 ± 2.9   | 111.82 ± 39.21 |                                                  |
|            | $k_L$ (L/mg)        | 1.69 ± 0.27   | 0.014 ± 0.007  |                                                  |
|            | $R^2$               | 0.980         | 0.873          |                                                  |
|            | Adj $R^2$           | 0.969         | 0.855          |                                                  |
|            | $\chi^2$            | 1.58          | 24.47          |                                                  |
|            | RSS                 | 7.93          | 171.31         |                                                  |
| Freundlich | $n$                 | 0.34 ± 0.04   | 0.7 ± 0.13     | Multilayer adsorption on heterogeneous surfaces. |
|            | $k_F$ (L/mg)        | 9.38 ± 1.66   | 2.84 ± 1.69    |                                                  |
|            | $R^2$               | 0.878         | 0.797          |                                                  |
|            | Adj $R^2$           | 0.854         | 0.768          |                                                  |
|            | $\chi^2$            | 7.65          | 39.30          |                                                  |
|            | RSS                 | 38.25         | 275.16         |                                                  |
| Sips       | $q_{m, exp}$ (mg/g) | 43.04         | 79.80 ± 3.99   | Mixed adsorption mechanisms.                     |
|            | $q_{m, cal}$ (mg/g) | 40.35 ± 2.57  | 78.93 ± 3.71   |                                                  |
|            | $k$ (L/mg)          | 3.59 ± 1.82   | 0.08 ± 0.005   |                                                  |
|            | $n$                 | 1.26 ± 0.17   | 2.51 ± 0.26    |                                                  |
|            | $R^2$               | 0.983         | 0.988          |                                                  |
|            | Adj $R^2$           | 0.975         | 0.985          |                                                  |
|            | $\chi^2$            | 1.27          | 15.12          |                                                  |
|            | RSS                 | 5.11          | 2.52           |                                                  |

## Supplementary File

**Table S3** Experimental design and results for Box-Behnken design (BBD)

| Run | Code levels |    |    | Conditions |                              |            | Adsorption Capacity (mg/g) |           |
|-----|-------------|----|----|------------|------------------------------|------------|----------------------------|-----------|
|     |             |    |    | pH         | Initial Concentration (mg/L) | Time (min) | Actual                     | Predicted |
| 1   | 1           | 0  | -1 | 10         | 165                          | 20         | 28.29                      | 29.44     |
| 2   | 0           | -1 | -1 | 6          | 10                           | 20         | 3.8896                     | 0.54      |
| 3   | 0           | 0  | 0  | 6          | 165                          | 100        | 38.3                       | 38.70     |
| 4   | -1          | 0  | -1 | 2          | 165                          | 20         | 38.29                      | 38.12     |
| 5   | -1          | -1 | 0  | 2          | 10                           | 100        | 12.9                       | 16.4      |
| 6   | 0           | 0  | 0  | 6          | 165                          | 100        | 38.3                       | 38.3      |
| 7   | 0           | 0  | 0  | 6          | 165                          | 100        | 38.3                       | 38.3      |
| 8   | -1          | 0  | 1  | 2          | 165                          | 180        | 60.68                      | 59.52     |
| 9   | 0           | 0  | 0  | 6          | 165                          | 100        | 38.3                       | 38.3      |
| 10  | 0           | 1  | -1 | 6          | 320                          | 20         | 47.12                      | 49.47     |
| 11  | 1           | 1  | 0  | 10         | 320                          | 100        | 50.19                      | 46.68     |
| 12  | 0           | 0  | 0  | 6          | 165                          | 100        | 38.3                       | 38.3      |
| 13  | 1           | -1 | 0  | 10         | 10                           | 100        | 7.896                      | 10.09     |
| 14  | -1          | 1  | 0  | 2          | 320                          | 100        | 75.32                      | 73.12     |
| 15  | 0           | -1 | 1  | 6          | 10                           | 180        | 18.89                      | 16.53     |
| 16  | 0           | 1  | 1  | 6          | 320                          | 180        | 57.56                      | 60.90     |
| 17  | 1           | 0  | 1  | 10         | 165                          | 180        | 35.3                       | 35.46     |

### Supplementary File

**Table S4** ANOVA for Box-Behnken Design for Cr adsorption capacity by CNT-CZB nanocomposite.

| Source           | Sum of Squares | df | Mean Square | F-value | p-value  | Remarks     |
|------------------|----------------|----|-------------|---------|----------|-------------|
| Model            | 5598.72        | 9  | 622.08      | 61.80   | < 0.0001 | Significant |
| $X_1$            | 536.51         | 1  | 536.51      | 53.30   | 0.0002   |             |
| $X_2$            | 4353.12        | 1  | 4353.12     | 432.49  | < 0.0001 |             |
| $X_3$            | 375.93         | 1  | 375.93      | 37.35   | 0.0005   |             |
| $X_1X_2$         | 101.26         | 1  | 101.26      | 10.06   | 0.0157   |             |
| $X_1X_3$         | 59.14          | 1  | 59.14       | 5.88    | 0.0458   |             |
| $X_2X_3$         | 5.20           | 1  | 5.20        | 0.5166  | 0.4956   |             |
| $X_1^2$          | 52.34          | 1  | 52.34       | 5.20    | 0.0566   |             |
| $X_2^2$          | 116.02         | 1  | 116.02      | 11.53   | 0.0115   |             |
| $X_3^2$          | 5.92           | 1  | 5.92        | 0.5882  | 0.4682   |             |
| Residual         | 70.46          | 7  | 10.07       |         |          |             |
| Lack of Fit      | 70.46          | 3  | 23.49       |         |          |             |
| Pure Error       | 0.0000         | 4  | 0.0000      |         |          |             |
| <b>Cor Total</b> | 5669.18        | 16 |             |         |          |             |

## Supplementary File

## Supplementary File

**Table S5** Model summary statistics.

| Source    | p-Value  | AIC    | BIC    | Adjusted R <sup>2</sup> | Predicted R <sup>2</sup> | Remarks   |
|-----------|----------|--------|--------|-------------------------|--------------------------|-----------|
| Linear    | < 0.0001 | 110.9  | 113.42 | 0.9124                  | 0.8526                   |           |
| 2FI       | 0.1373   | 107.11 | 112.94 | 0.9328                  | 0.7909                   |           |
| Quadratic | 0.0288   | 92.41  | 100.75 | 0.9716                  | 0.8011                   | Suggested |

**Table S6** Fit statistics for the quadratic model.

| Parameter | Value | Parameter                | Value   |
|-----------|-------|--------------------------|---------|
| Std. Dev. | 3.17  | R <sup>2</sup>           | 0.9876  |
| Mean      | 36.93 | Adjusted R <sup>2</sup>  | 0.9716  |
| C.V. %    | 8.59  | Predicted R <sup>2</sup> | 0.8011  |
|           |       | Adeq Precision           | 29.8287 |
